# Supplementary material
Source: HighWire-hosted journal article supplement (https://www.cmajopen.ca/highwire/filestream/84446/field_highwire_adjunct_files/0/2020-0037-1-at.pdf)
Supplement: 2020-0037-1-at.pdf [file 2020-0037-1-at.pdf]

Appendix 1 (as supplied by the authors)

| <b>Table S1: Physician Categorization and Characteristics for 2014</b> |                          |                           |
|------------------------------------------------------------------------|--------------------------|---------------------------|
|                                                                        | <b>PT</b>                | <b>FT</b>                 |
| <b>GP Counts &amp; Characteristics</b>                                 |                          |                           |
| Count                                                                  | 1076                     | 2106                      |
| Gender – M (%)                                                         | 466 (43.3)               | 1429 (67.9)               |
| Years Since Graduation (sd)                                            | 20.49 (12.9)             | 22.40 (11.5)              |
| International Medical Graduate (%)                                     | 185 (17.2)               | 779 (37.1)                |
| <b>Service Days</b>                                                    |                          |                           |
| Service Days with 10 patient min (sd)                                  | 79.23 (41.1)             | 200.45 (38.7)             |
| Service Days with 20 patient min (sd)                                  | 43.62 (38.0)             | 155.82 (62.6)             |
| Service Days with any patients (sd)                                    | 117.57 (55.5)            | 221.91 (41.5)             |
| Average Service Days per week with 10 patient min                      | 1.7                      | 4.4                       |
| Average Service Days per week with any patients                        | 2.6                      | 4.8                       |
| Days <10 Patients (sd)                                                 | 38.3 (47.6)              | 21.5 (23.0)               |
| Weekend Days with 10+ (sd)                                             | 12.8 (13.8)              | 20.9 (19.7)               |
| Weekend Days with 20+ (sd)                                             | 10.0 (12.9)              | 16.6 (18.4)               |
| <b>Annual Gross Revenue (Median and Interquartile Range)</b>           |                          |                           |
| <i>Annual Gross Revenue (Median and Interquartile Range)</i>           | \$142729 (84956, 212661) | \$364815 (271859, 486201) |
| <b>Panel Characteristics and Patient Volume</b>                        |                          |                           |
| Panel Size (sd)                                                        | 362.5 (282.4)            | 1234.6 (680.8)            |
| Percentage of Claims from Panel (sd)                                   | 45.5 (24.5)              | 68.6 (21.5)               |
| Average Patient Volume (sd)                                            | 18.8 (10.6)              | 28.7 (11.8)               |
| <b>GP Practice Location By Zone</b>                                    |                          |                           |
| <i>Zone 1 (%)</i>                                                      | 53 (4.9)                 | 172 (8.2)                 |
| <i>Zone 2 (%)</i>                                                      | 476 (44.2)               | 746 (35.4)                |
| <i>Zone 3 (%)</i>                                                      | 98 (9.1)                 | 275 (13.1)                |
| <i>Zone 4 (%)</i>                                                      | 326 (30.3)               | 714 (33.9)                |
| <i>Zone 5 (%)</i>                                                      | 99 (9.2)                 | 191 (9.1)                 |
| <i>Unknown Zone</i>                                                    | 24 (2.2)                 | 8 (0.4)                   |
| <b>GP Practice Location By Urban-Rural Continuum</b>                   |                          |                           |
| URBAN (%)                                                              | 92 (8.6)                 | 247 (11.7)                |
| METRO (%)                                                              | 660 (61.3)               | 1106 (52.5)               |
| MODERATE METRO INFLUENCE (%)                                           | 85 (7.9)                 | 284 (13.5)                |
| MODERATE URBAN INFLUENCE (%)                                           | 5 (0.5)                  | 22 (1.0)                  |
| RURAL (%)                                                              | 146 (13.6)               | 314 (14.9)                |
| RURAL CENTRE AREA (%)                                                  | 38 (3.5)                 | 87 (4.1)                  |
| RURAL REMOTE                                                           | 25 (2.3)                 | 38 (1.8)                  |
| Unknown                                                                | 25 (2.3)                 | 8 (0.4)                   |

Appendix 1 (as supplied by the authors)

| <b>Table S2: Physician Categorization and Characteristics for 2013</b> |                          |                           |
|------------------------------------------------------------------------|--------------------------|---------------------------|
|                                                                        | <b>PT</b>                | <b>FT</b>                 |
| <b>GP Counts &amp; Characteristics</b>                                 |                          |                           |
| Count                                                                  | 1036                     | 1985                      |
| Gender – M (%)                                                         | 450 (43.4)               | 1352 (68.1)               |
| Years Since Graduation (sd)                                            | 20.2 (12.4)              | 22.4 (11.1)               |
| International Medical Graduate (%)                                     | 180 (17.4)               | 751 (37.9)                |
| <b>Service Days</b>                                                    |                          |                           |
| Service Days with 10 patient min (sd)                                  | 77.69 (41.4)             | 201.41 (38.3)             |
| Service Days with 20 patient min (sd)                                  | 40.96 (37.0)             | 154.85 (63.8)             |
| Service Days with any patients (sd)                                    | 118.40 (58.2)            | 224.65 (41.1)             |
| Average Service Days per week with 10 patient min                      | 1.7                      | 4.4                       |
| Average Service Days per week with any patients                        | 2.6                      | 4.9                       |
| Days <10 Patients (sd)                                                 | 40.7 (49.7)              | 23.25 (23.3)              |
| Weekend Days with 10+ (sd)                                             | 12.1 (13.5)              | 20.44 (19.8)              |
| Weekend Days with 20+ (sd)                                             | 9.2 (12.2)               | 16.07 (18.5)              |
| <b>Annual Gross Revenue (Median and Interquartile Range)</b>           |                          |                           |
| <i>Annual Gross Revenue (Median and Interquartile Range)</i>           | \$140996 (80205, 212944) | \$361149 (274084, 475085) |
| <b>Panel Characteristics and Patient Volume</b>                        |                          |                           |
| Panel Size (sd)                                                        | 362.7 (2721.0)           | 1276.9 (694.6)            |
| Percentage of Claims from Panel (sd)                                   | 45.9 (24.6)              | 69.13 (21.1)              |
| Average Patient Volume (sd)                                            | 18.4 (10.4)              | 28.28 (11.6)              |
| <b>GP Practice Location By Zone</b>                                    |                          |                           |
| <i>Zone 1 (%)</i>                                                      | 55 (5.3)                 | 167 (8.4)                 |
| <i>Zone 2 (%)</i>                                                      | 445 (43.0)               | 680 (34.3)                |
| <i>Zone 3 (%)</i>                                                      | 94 (9.1)                 | 262 (13.2)                |
| <i>Zone 4 (%)</i>                                                      | 319 (30.8)               | 677 (34.1)                |
| <i>Zone 5 (%)</i>                                                      | 91 (8.8)                 | 192 (9.7)                 |
| <i>Unknown Zone</i>                                                    | 32 (3.1)                 | 7 (0.4)                   |
| <b>GP Practice Location By Urban-Rural Continuum</b>                   |                          |                           |
| URBAN (%)                                                              | 86 (8.3)                 | 240 (12.1)                |
| METRO (%)                                                              | 614 (59.3)               | 1039 (52.3)               |
| MODERATE METRO INFLUENCE (%)                                           | 87 (8.4)                 | 255 (12.8)                |
| MODERATE URBAN INFLUENCE (%)                                           | 4 (0.4)                  | 25 (1.3)                  |
| RURAL (%)                                                              | 151 (14.6)               | 293 (14.8)                |
| RURAL CENTRE AREA (%)                                                  | 41 (4.0)                 | 87 (4.4)                  |
| RURAL REMOTE                                                           | 21 (2.0)                 | 39 (2.0)                  |
| Unknown                                                                | 32 (3.1)                 | 7 (0.4)                   |

Appendix 1 (as supplied by the authors)

| <b>Table S3: Physician Categorization and Characteristics for 2012</b> |                          |                           |
|------------------------------------------------------------------------|--------------------------|---------------------------|
|                                                                        | <b>PT</b>                | <b>FT</b>                 |
| <b>GP Counts &amp; Characteristics</b>                                 |                          |                           |
| Count                                                                  | 965                      | 1935                      |
| Gender – M (%)                                                         | 417 (43.2)               | 1344 (69.5)               |
| Years Since Graduation (sd)                                            | 19.7 (11.9)              | 22.3 (10.9)               |
| International Medical Graduate (%)                                     | 179 (18.6)               | 724 (37.5)                |
| <b>Service Days</b>                                                    |                          |                           |
| Service Days with 10 patient min (sd)                                  | 77.6 (41.7)              | 200.9 (36.8)              |
| Service Days with 20 patient min (sd)                                  | 42.0 (37.3)              | 156.0 (62.0)              |
| Service Days with any patients (sd)                                    | 118.1 (56.8)             | 224.9 (40.5)              |
| Average Service Days per week with 10 patient min                      | 1.69                     | 4.4                       |
| Average Service Days per week with any patients                        | 2.57                     | 4.9                       |
| Days <10 Patients (sd)                                                 | 40.5 (47.8)              | 24.0 (23.4)               |
| Weekend Days with 10+ (sd)                                             | 12.6 (13.6)              | 20.2 (19.0)               |
| Weekend Days with 20+ (sd)                                             | 9.9 (12.6)               | 15.8 (17.8)               |
| <b>Annual Gross Revenue (Median and Interquartile Range)</b>           |                          |                           |
| <i>Annual Gross Revenue (Median and Interquartile Range)</i>           | \$139752 (80689, 211515) | \$362759 (278583, 470629) |
| <b>Panel Characteristics and Patient Volume</b>                        |                          |                           |
| Panel Size (sd)                                                        | 368.5 (277.2)            | 1287.5 (681.5)            |
| Percentage of Claims from Panel (sd)                                   | 45.3 (24.5)              | 68.9 (21.2)               |
| Average Patient Volume (sd)                                            | 18.7 (10.7)              | 28.6 (11.6)               |
| <b>GP Practice Location By Zone</b>                                    |                          |                           |
| <i>Zone 1 (%)</i>                                                      | 55 (5.7)                 | 157 (8.1)                 |
| <i>Zone 2 (%)</i>                                                      | 408 (42.3)               | 667 (34.5)                |
| <i>Zone 3 (%)</i>                                                      | 83 (8.6)                 | 255 (13.2)                |
| <i>Zone 4 (%)</i>                                                      | 301 (31.2)               | 654 (33.8)                |
| <i>Zone 5 (%)</i>                                                      | 92 (9.5)                 | 195 (10.1)                |
| <i>Unknown Zone</i>                                                    | 26 (2.7)                 | 7 (0.4)                   |
| <b>GP Practice Location By Urban-Rural Continuum</b>                   |                          |                           |
| <i>URBAN (%)</i>                                                       | 84 (8.7)                 | 232 (12.0)                |
| <i>METRO (%)</i>                                                       | 577 (59.8)               | 990 (51.2)                |
| <i>MODERATE METRO INFLUENCE (%)</i>                                    | 84 (8.7)                 | 260 (13.4)                |
| <i>MODERATE URBAN INFLUENCE (%)</i>                                    | 5 (0.5)                  | 22 (1.1)                  |
| <i>RURAL (%)</i>                                                       | 131 (13.6)               | 299 (15.5)                |
| <i>RURAL CENTRE AREA (%)</i>                                           | 35 (3.6)                 | 85 (4.4)                  |
| <i>RURAL REMOTE</i>                                                    | 23 (2.4)                 | 40 (2.1)                  |
| <i>Unknown</i>                                                         | 26 (2.7)                 | 7 (0.4)                   |

Appendix 1 (as supplied by the authors)

| <b>Table S4: Physician Categorization and Characteristics for 2011</b> |                          |                           |
|------------------------------------------------------------------------|--------------------------|---------------------------|
|                                                                        | <b>PT</b>                | <b>FT</b>                 |
| <b>GP Counts &amp; Characteristics</b>                                 |                          |                           |
| Count                                                                  | 868                      | 1895                      |
| Gender – M (%)                                                         | 379 (43.7)               | 1299 (68.5)               |
| Years Since Graduation (sd)                                            | 19.2 (11.6)              | 21.9 (10.7)               |
| International Medical Graduate (%)                                     | 171 (19.7)               | 707 (37.4)                |
| <b>Service Days</b>                                                    |                          |                           |
| Service Days with 10 patient min (sd)                                  | 77.1 (41.7)              | 202.0 (36.8)              |
| Service Days with 20 patient min (sd)                                  | 41.5 (36.7)              | 157.2 (62.3)              |
| Service Days with any patients (sd)                                    | 117.4 (57.8)             | 226.5 (40.9)              |
| Average Service Days per week with 10 patient min                      | 1.67                     | 4.39                      |
| Average Service Days per week with any patients                        | 2.55                     | 4.92                      |
| Days <10 Patients (sd)                                                 | 40.4 (48.0)              | 24.5 (24.0)               |
| Weekend Days with 10+ (sd)                                             | 12.3 (13.5)              | 19.9 (18.8)               |
| Weekend Days with 20+ (sd)                                             | 9.1 (12.2)               | 15.5 (17.5)               |
| <b>Annual Gross Revenue (Median and Interquartile Range)</b>           |                          |                           |
| <i>Annual Gross Revenue (Median and Interquartile Range)</i>           | \$139589 (77699, 207823) | \$358810 (271079, 469551) |
| <b>Panel Characteristics and Patient Volume</b>                        |                          |                           |
| Panel Size (sd)                                                        | 365.3 (281.7)            | 1289.93 (678.7)           |
| Percentage of Claims from Panel (sd)                                   | 45.0 (24.6)              | 68.85 (21.0)              |
| Average Patient Volume (sd)                                            | 18.8 (10.8)              | 28.69 (11.8)              |
| <b>GP Practice Location By Zone</b>                                    |                          |                           |
| <i>Zone 1 (%)</i>                                                      | 46 (5.3)                 | 152 (8.0)                 |
| <i>Zone 2 (%)</i>                                                      | 368 (42.4)               | 650 (34.3)                |
| <i>Zone 3 (%)</i>                                                      | 80 (9.2)                 | 253 (13.4)                |
| <i>Zone 4 (%)</i>                                                      | 255 (29.4)               | 629 (33.2)                |
| <i>Zone 5 (%)</i>                                                      | 84 (9.7)                 | 204 (10.8)                |
| <i>Unknown Zone</i>                                                    | 35 (4.0)                 | 7 (0.4)                   |
| <b>GP Practice Location By Urban-Rural Continuum</b>                   |                          |                           |
| <i>URBAN (%)</i>                                                       | 83 (9.6)                 | 226 (11.9)                |
| <i>METRO (%)</i>                                                       | 511 (58.9)               | 946 (49.9)                |
| <i>MODERATE METRO INFLUENCE (%)</i>                                    | 69 (7.9)                 | 255 (13.5)                |
| <i>MODERATE URBAN INFLUENCE (%)</i>                                    | 3 (0.3)                  | 22 (1.2)                  |
| <i>RURAL (%)</i>                                                       | 118 (13.6)               | 312 (16.5)                |
| <i>RURAL CENTRE AREA (%)</i>                                           | 28 (3.2)                 | 84 (4.4)                  |
| <i>RURAL REMOTE</i>                                                    | 21 (2.4)                 | 43 (2.3)                  |
| <i>Unknown</i>                                                         | 35 (4.0)                 | 7 (0.4)                   |

**Appendix 1 (as supplied by the authors)**

| <b>Table S5: Descriptives of Very Low Volume Physicians Included in Analysis (2015 Fiscal Year)</b> |                               |                                |                                                |                                                 |                                                 |                                                 |                                                 |
|-----------------------------------------------------------------------------------------------------|-------------------------------|--------------------------------|------------------------------------------------|-------------------------------------------------|-------------------------------------------------|-------------------------------------------------|-------------------------------------------------|
|                                                                                                     | Averaged < 5 patients per day | Averaged < 10 patients per day | Had Less than 5 service days with 10+ patients | Had Less than 10 service days with 10+ patients | Had Less than 15 service days with 10+ patients | Had Less than 20 service days with 10+ patients | Had Less than 30 service days with 10+ patients |
| GP Count (%)                                                                                        | 28                            | 199                            | 48                                             | 83                                              | 107                                             | 136                                             | 201                                             |
| Gender – M (%)                                                                                      | 14 (50.0)                     | 90 (45.2)                      | 25 (52.1)                                      | 43 (51.8)                                       | 56 (52.3)                                       | 64 (47.1)                                       | 93 (46.3)                                       |
| Years Since Graduation (sd)                                                                         | 28.7 (9.5)                    | 26.2 (12.9)                    | 25.2 (14.0)                                    | 23.2 (13.7)                                     | 22.6 (13.9)                                     | 20.9 (13.8)                                     | 20.9 (13.6)                                     |
| Service Days per year with 10 patient min (sd)                                                      | 5.4 (7.6)                     | 37.41 (33.33)                  | 2.23 (1.2)                                     | 4.0 (2.5)                                       | 5.8 (4.0)                                       | 8.3(6.0)                                        | 13.3 (10.0)                                     |
| Service Days per year with 20 patient min (sd)                                                      | 0.2 (0.7)                     | 3.4 (6.9)                      | 0.71 (1.2)                                     | 1.36 (2.2)                                      | 2.16 (3.1)                                      | 2.9 (4.2)                                       | 4.3 (6.2)                                       |
| Service Days per year with any patients (sd)                                                        | 148.0 (71.9)                  | 143.4 (71.4)                   | 76.7 (77.8)                                    | 63.8 (73.1)                                     | 60.2 (69.7)                                     | 58.4 (65.1)                                     | 67.4 (70.3)                                     |
| <b>Annual Gross Revenue (Median and Interquartile Range)</b>                                        | \$106,952 (25210, 174974)     | \$104907 (49737, 161926)       | \$18229 (5443, 106054)                         | \$16190 (7109, 49737)                           | \$20216 (9738, 49737)                           | \$23232 (12904, 50002)                          | \$35400 (17140, 75098)                          |
